# Supplementary material for: Perception of Virtual Learning among Dental Residents and Faculty during the COVID-19 Pandemic
Source: Preprints.org preprint supplement (doi:10.20944/preprints202405.1083.v1), 2024-05-16
Supplement: Supplementary file 1 [file supplementary]

Archive with 2 entries (2 files):
- Faculty_EIOH_GD_Virtual learning survey_09132021.pdf
- Resident_EIOH_GD_Virtual learning survey_06202021.pdf
