# Supplementary material for: Perception of Virtual Learning among Dental Residents and Faculty during the COVID-19 Pandemic
Source: Preprints.org preprint supplement (doi:10.20944/preprints202405.1083.v1), 2024-05-16
Supplement: Supplementary file 1 [file supplementary › Resident_EIOH_GD_Virtual learning survey_06202021.pdf]

**Please complete the following questions****1. Your gender**

- 1) Male      2) Female      3) Non-binary

**2. Age**

- 1) 20-30      2) 31-40      3) 41-50      4) 51-60      5) >60

**3. Where did you receive your DDS/DMD?**

- 1) US/Canada      2) Outside of US/Canada

**4. How long have you been practicing dentistry? \_\_\_\_\_ Years****5. Which residency program are you currently in?**

- 1) 1-year AEGD  
2) 2-year AEGD  
3) 3-year AEGD (Community, Urgent care, Research, Complex care, Master program)  
4) 4-year Advanced Faculty Training Program  
4) 1-year GPR  
5) 2-year GPR  
6) Preceptorship

**6. When will you graduate from your program at the EIOH?**

- 1) 2021      2) 2022      3) 2023      4) 2024
- 

**Section A- Perception for virtual learning****1. What device do you use the most for virtual learning?**

- 1) Laptop      2) Desktop      3) Tablet      4) Smartphone

**2. How do you feel overall about virtual learning education at EIOH AEGD?**

| Courses                  | Poor | Below average | Average | Good | Excellent |
|--------------------------|------|---------------|---------|------|-----------|
| a) Didactic lectures     |      |               |         |      |           |
| b) Research presentation |      |               |         |      |           |
| c) Case presentation     |      |               |         |      |           |
| d) Literature review     |      |               |         |      |           |
| e) Meetings              |      |               |         |      |           |

3. How effective has virtual learning been for you, comparing to in-person learning, for the following courses?

| Courses                  | Not at all effective | Less effective | Equally effective | More effective | Extremely effective |
|--------------------------|----------------------|----------------|-------------------|----------------|---------------------|
| a) Didactic lectures     |                      |                |                   |                |                     |
| b) Research presentation |                      |                |                   |                |                     |
| c) Case presentation     |                      |                |                   |                |                     |
| d) Literature review     |                      |                |                   |                |                     |
| e) Meetings              |                      |                |                   |                |                     |

4. How would you rate your engagement in virtual learning, comparing to in-person learning, for the following courses?

| Courses                  | Not at all engaged | Less engaged | Equally engaged | More engaged | Extremely engaged |
|--------------------------|--------------------|--------------|-----------------|--------------|-------------------|
| a) Didactic lectures     |                    |              |                 |              |                   |
| b) Research presentation |                    |              |                 |              |                   |
| c) Case presentation     |                    |              |                 |              |                   |
| d) Literature review     |                    |              |                 |              |                   |
| e) Meetings              |                    |              |                 |              |                   |

5. How would you rate your interactions with your co-residents and instructors during virtual learning, comparing to in-person learning, for the following courses?

| Courses                  | No interactions | Less interactions | Equal interactions | More interaction | Extremely more interactions |
|--------------------------|-----------------|-------------------|--------------------|------------------|-----------------------------|
| a) Didactic lectures     |                 |                   |                    |                  |                             |
| b) Research presentation |                 |                   |                    |                  |                             |
| c) Case presentation     |                 |                   |                    |                  |                             |
| d) Literature review     |                 |                   |                    |                  |                             |
| e) Meetings              |                 |                   |                    |                  |                             |

6. In the coming year, what learning format would you prefer for the following courses?

| Courses                  | In-person | Virtual | Hybrid |
|--------------------------|-----------|---------|--------|
| a) Didactic lectures     |           |         |        |
| b) Research presentation |           |         |        |
| c) Case presentation     |           |         |        |
| d) Literature review     |           |         |        |
| e) Meetings              |           |         |        |

7. Do you have other comments for AEGD virtual learning?

**Section B**

|    | Please indicate next to each statement the extent to which each is true for you. Circle your response. | Definitely untrue | Not true | Probably not true | Neither true nor untrue | Probably true | True | Definitely true |
|----|--------------------------------------------------------------------------------------------------------|-------------------|----------|-------------------|-------------------------|---------------|------|-----------------|
| 1  | I prefer to work without instructions from others                                                      | 0                 | 1        | 2                 | 3                       | 4             | 5    | 6               |
| 2  | Rules and regulations are helpful and necessary for me                                                 | 0                 | 1        | 2                 | 3                       | 4             | 5    | 6               |
| 3  | For me, it is very important to carry out the obligations placed on me                                 | 0                 | 1        | 2                 | 3                       | 4             | 5    | 6               |
| 4  | I generally solve problems creatively                                                                  | 0                 | 1        | 2                 | 3                       | 4             | 5    | 6               |
| 5  | I'm not bothered about reviewing or checking things really closely                                     | 0                 | 1        | 2                 | 3                       | 4             | 5    | 6               |
| 6  | I like to do things in a new way                                                                       | 0                 | 1        | 2                 | 3                       | 4             | 5    | 6               |
| 7  | I always try to make my work as accurate and error free as possible                                    | 0                 | 1        | 2                 | 3                       | 4             | 5    | 6               |
| 8  | I like trying out lots of different things, and am often successful in doing so                        | 0                 | 1        | 2                 | 3                       | 4             | 5    | 6               |
| 9  | It is important to me that my achievements are recognized and valued by other people                   | 0                 | 1        | 2                 | 3                       | 4             | 5    | 6               |
| 10 | I often think about what other people expect of me                                                     | 0                 | 1        | 2                 | 3                       | 4             | 5    | 6               |

**Section C**

**Overall, based on your definition of burnout, how would you rate your level of burnout?**

- A. I enjoy work I have no symptoms of burnout.
- B. Occasionally I am under stress and I don't have as much energy as I once did, but I don't feel burned out.
- C. I am definitely burned out and have one or more symptoms of burnout, such as physical and emotional exhaustion.
- D. The symptoms of burnout that I'm experiencing won't go away. I think about frustration at work a lot.
- E. I feel completely burned out and often wonder if I can go on. I am at the point where I made some changes or may need to seek some sort of help.
